# Supplementary material
Source: Springer Nature journal article supplement (https://www.springermedizin.de/resource/supplementary/12899_2012_200_MOESM9_ESM.pdf/9514664)

A, Baseline

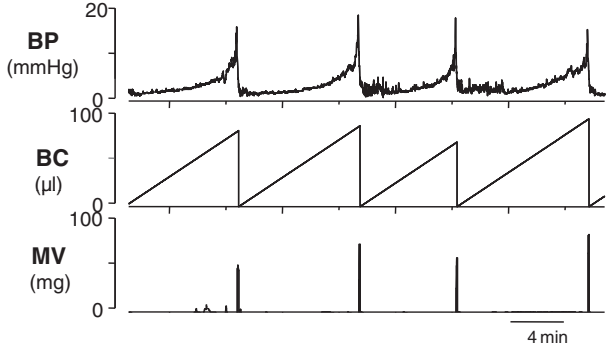

B, VEGF  
(2 weeks)

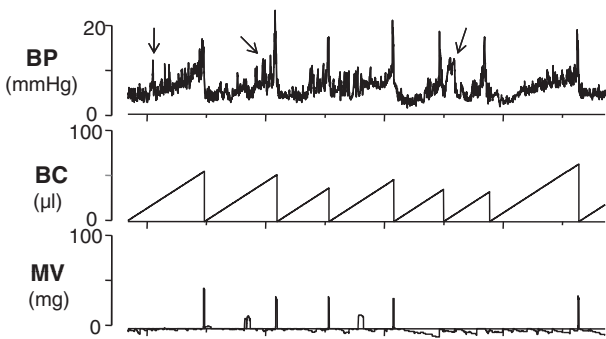

Supplement: MOESM9 [file 9514664]
